# Supplementary material for: Architecturally robust design of ethylenediamine-assisted polyaniline/MXene nanohybrids for symmetric pouch-cell supercapacitors
Source: Royal Society of Chemistry journal article supplement (doi:10.1039/d5na00692a), 2025-01-01
Supplement: d5na00692a1.pdf [file d5na00692a1.pdf]

## **Electronic Supplementary Information**

# **Architecturally Robust Design of Ethylenediamine-Assisted Polyaniline/MXene Nanohybrids for Symmetric Pouch-Cell Supercapacitors**

**Sithara Radhakrishnan<sup>a</sup>, Subhashree Mohapatra<sup>a</sup>, Anagha PS<sup>a</sup>, Akshaya Shibu<sup>a</sup>, Namsheer KK<sup>a</sup>, Manasi Pathak<sup>a</sup>, Sang Mun Jeong<sup>b</sup>, Chandra Sekhar Rout<sup>\*ab</sup>**

*<sup>a</sup>Centre for Nano and Material Sciences, Jain (Deemed-to-be University), Jain Global Campus, Kanakapura Road, Bangalore 562112, Karnataka, India.*

*<sup>b</sup>Department of Chemical Engineering, Chungbuk National University, Cheongju, Chungbuk 28644, Republic of Korea*

*\*Corresponding author: [r.chandrasekhar@jainuniversity.ac.in](mailto:r.chandrasekhar@jainuniversity.ac.in)*

### **S1. Material characterization**

The phase and structural characterisation of samples was carried out using Rigaku Ultima IV having a Ni-filter for Cu-K $\alpha$  radiation,  $\lambda = 0.1541$  nm at a scanning rate of 3 °/min. The morphology of prepared samples was determined with the help of field emission scanning electron microscopy (FESEM, JEOL JSM-7100F, JEOL Ltd., Singapore). The valence state and chemical compositions of the prepared samples were determined using Thermo Fisher ESCALAB Xi<sup>+</sup>.

### **S2. Electrochemical characterization**

The electrochemical characterisations were carried out on a CS Corrtest CS350 electrochemical workstation Version 5.3 from Wuhan using CS Studio software. The working electrode was constructed by dispersing 2 mg active material in nafion and IPA (1:19) solution, then drop-casted onto a glassy carbon electrode and dried at RT. The electrochemical performance of the prepared samples was investigated in three-electrode configuration constituting working electrode, saturated Ag/AgCl reference electrode, and Pt wire counter electrode in the presence of 1 M H<sub>2</sub>SO<sub>4</sub> aqueous electrolyte. Electrochemical examinations included: (i) cyclic voltammetry (CV) studies at scan rate in the range 10-100 mV s<sup>-1</sup>, (ii) galvanostatic charging/discharging (GCD) tests at different current density, and (iii) electrochemical impedance spectroscopy (EIS) analysis using an open-circuit voltage with an amplitude of 5 mV, spanning the frequency range of 100 kHz to 0.01 Hz.

### S3. Pouch cell fabrication

For pouch cell fabrication, PANI/MXene-EDA, carbon black, and PVDF were blended in an 80:10:10 weight ratio and dry-ground using a mortar and pestle for 2 hours. NMP solvent was then added gradually to the mixture, followed by an additional 1 hour of grinding to obtain a homogeneous slurry. This slurry was then drop-casted onto stainless steel (SS) foil current collectors with a defined surface area of  $1\text{ cm} \times 1\text{ cm}$ . Each electrode contained 3 mg of active material. The electrodes were dried in a hot air vacuum oven at  $70\text{ }^{\circ}\text{C}$  for 12 hours. Finally, a symmetric cell was assembled using the two prepared electrodes, with 1 M  $\text{H}_2\text{SO}_4$  serving as the electrolyte for electrochemical testing. The areal capacitance ( $C_A$ ), energy density (ED), and power density (PD) were estimated from the charge–discharge profile curves using the following equations: [1]

$$C_A = \left( \frac{I * \Delta t}{A * \Delta V} \right) \quad (\text{S1})$$

Where,  $C_A$  is the specific capacitance ( $\text{mF}/\text{cm}^2$ ),  $I$  is the current response (mA) of the electrode for unit area contact with electrolyte,  $\Delta t$  is the discharge time, and  $\Delta V$  is the potential operation window.

$$ED = \left( \frac{1}{2} * C_A * (V_2 - V_1)^2 \right) / 3.6 \quad (\text{S2})$$

$$PD = (E/\Delta t) * 3600 \quad (\text{S3})$$

Where  $C_A$  is the specific capacitance ( $V_2 - V_1$ ) is the potential window ( $V_2$  and  $V_1$  are the final and initial potential values, respectively) and  $\Delta t$  is the discharge time.

### References

1. S. Radhakrishnan, M. Monisha, S. R. Ka, M. Saxena, S. M. Jeong and C. S. Rout, Adv. Sustain. Syst., DOI:10.1002/adsu.202400529.
